# Supplementary material
Source: HighWire-hosted journal article supplement (doi:10.1101/rna.071902.119)
Supplement: Supplemental_Table.xlsx [file Supplemental_Table.xlsx]

## Sheet: Table S1
Table S1. Total fragments and unique sequences in the partially edited ND7-5' sequence libraries.
(A) The breakdown of the number of fragments (decollapsed) in each sample (uninduced (-) and induced (+))
for the MRB10130 RNAi deep sequencing samples. Standard alignment (i.e. no non-T insertions, deletions or SNPs)
and non-standard (i.e. with non-T errors) with a breakdown of the number of mismatches within the non-standard sequences
(1, 2, >3) are shown. (B) The number of unique (collapsed) sequences represented in each category for the data set.
A) ND7-5': Fragments
RNAi	Replicate	Induction	Standard Alignments	Non-Standard	1-Mismatch	2-Mismatch	>3-Mismatch	Indels	Total
MRB10130	1	-	471013 (89.63%)	54522 (10.37%)	10770 (2.05%)	588 (0.11%)	306 (0.06%)	42858 (8.16%)	525535
MRB10130	1	+	316416 (93.52%)	21931 (6.48%)	6927 (2.05%)	315 (0.09%)	130 (0.04%)	14559 (4.30%)	338347
MRB10130	2	-	525213 (89.98%)	58491 (10.02%)	11540 (1.98%)	626 (0.11%)	286 (0.05%)	46039 (7.89%)	583704
MRB10130	2	+	439185 (92.47%)	35789 (7.53%)	9477 (2.00%)	415 (0.09%)	220 (0.05%)	25677 (5.41%)	474974
		Total	1751827	170733	38714	1944	942	129133	1922560
B) ND7-5': Unique Sequences
RNAi	Replicate	Induction	Standard Alignments	Non-Standard	1-Mismatch	2-Mismatch	>3-Mismatch	Indels	Total
MRB10130	1	-	54615 (60.70%)	35353 (39.30%)	4100 (4.56%)	523 (0.58%)	291 (0.32%)	30439 (33.83%)	89968
MRB10130	1	+	5484 (46.36%)	6346 (53.64%)	530 (4.48%)	250 (2.11%)	123 (1.04%)	5443 (46.01%)	11830
MRB10130	2	-	59512 (60.78%)	38396 (39.22%)	4711 (4.81%)	553 (0.56%)	277 (0.28%)	32855 (33.56%)	97908
MRB10130	2	+	19145 (54.98%)	15674 (45.02%)	1630 (4.68%)	333 (0.96%)	202 (0.58%)	13509 (38.8%)	34819
		Total	138756	95769	10971	1659	893	82246	234525

## Sheet: Table S2
Table S2. Total fragments and unique sequences in the partially edited RPS12 sequence libraries.
(A) The breakdown of the number of fragments (decollapsed) in each sample (uninduced (-) and induced (+))
for the MRB10130 RNAi deep sequencing samples. Standard alignment (i.e. no non-T insertions, deletions or SNPs)
and non-standard (i.e. with non-T errors) with a breakdown of the number of mismatches within the non-standard sequences
(1, 2, >3) are shown. (B) The number of unique (collapsed) sequences represented in each category for the data set.
A) RPS12: Fragments
RNAi	Replicate	Induction	Standard Alignments	Non-Standard	1-Mismatch	2-Mismatch	>3-Mismatch	Indels	Total
MRB10130	1	-	254744 (72.60%)	96130 (27.40%)	10178 (2.90%)	656 (0.19%)	184 (0.05%)	85112 (24.26%)	350874
MRB10130	1	+	398783 (78.49%)	109259 (21.51%)	17637 (3.47%)	1447 (0.28%)	563 (0.11%)	89612 (17.64%)	508042
MRB10130	2	-	291850 (71.06%)	118850 (28.94%)	11689 (2.85%)	807 (0.20%)	269 (0.07%)	106085 (25.83%)	410700
MRB10130	2	+	323420 (79.46%)	83626 (20.54%)	13640 (3.35%)	1113 (0.27%)	417 (0.10%)	68456 (16.82%)	407046
		Total	1268797	407865	53144	4023	1433	349265	1676662
B) RPS12: Unique Sequences
RNAi	Replicate	Induction	Standard Alignments	Non-Standard	1-Mismatch	2-Mismatch	>3-Mismatch	Indels	Total
MRB10130	1	-	97219 (52.46%)	88099 (47.54%)	8399 (4.53%)	649 (0.35%)	184 (0.10%)	78867 (42.56%)	185318
MRB10130	1	+	60586 (42.08%)	83403 (57.92%)	8971 (6.23%)	1371 (0.95%)	562 (0.39%)	72499 (50.35%)	143989
MRB10130	2	-	109524 (50.18%)	108759 (49.82%)	9655 (4.42%)	800 (0.37%)	269 (0.12%)	98035 (44.91%)	218283
MRB10130	2	+	52620 (44.68%)	65162 (55.32%)	7437 (6.31%)	1068 (0.91%)	416 (0.35%)	56241 (47.75%)	117782
		Total	319949	345423	34462	3888	1431	305642	665372

## Sheet: Table S3
Table S3. Total fragments and unique sequences in the partially edited CYb sequence libraries.
(A) The breakdown of the number of fragments (decollapsed) in each sample (uninduced (-) and induced (+))
for the RNAi samples used in this study. Standard alignment (i.e. no non-T insertions, deletions or SNPs)
and non-standard (i.e. with non-T errors) with a breakdown of the number of mismatches within the non-standard sequences
(1, 2, >3) are shown. (B) The number of unique (collapsed) sequences represented in each category for the data set.
A) CYb: Fragments
RNAi	Replicate	Induction	Standard Alignments	Non-Standard	1-Mismatch	2-Mismatch	>3-Mismatch	Indels	Total
MRB3010	1	-	315736 (93.78%)	20951 (6.22%)	2103 (0.62%)	126 (0.04%)	27 (0.01%)	18695 (5.55%)	336687
MRB3010	2	-	326680 (93.55%)	22514 (6.45%)	2165 (0.62%)	124 (0.04%)	27 (0.01%)	20198 (5.78%)	349194
MRB800	1	-	270190 (94.27%)	16413 (5.73%)	1836 (0.64%)	81 (0.03%)	20 (0.01%)	14476 (5.05%)	286603
MRB800	2	-	345634 (93.61%)	23576 (6.39%)	2458 (0.67%)	129 (0.03%)	36 (0.01%)	20953 (5.68%)	369210
MRB7260	1	-	335835 (94.51%)	19518 (5.49%)	2214 (0.62%)	125 (0.04%)	13 (0.00%)	17166 (4.83%)	355353
MRB7260	1	+	119728 (95.16%)	6086 (4.84%)	810 (0.64%)	36 (0.03%)	13 (0.01%)	5227 (4.15%)	125814
MRB7260	2	-	283472 (94.98%)	14986 (5.02%)	1803 (0.60%)	83 (0.03%)	15 (0.01%)	13085 (4.38%)	298458
MRB7260	2	+	143695 (95.09%)	7412 (4.91%)	1028 (0.68%)	45 (0.03%)	13 (0.01%)	6326 (4.19%)	151107
MRB10130	1	-	285926 (94.04%)	18110 (5.96%)	1877 (0.62%)	68 (0.02%)	18 (0.01%)	16147 (5.31%)	304036
MRB10130	1	+	269975 (95.42%)	12949 (4.58%)	1765 (0.62%)	90 (0.03%)	16 (0.01%)	11078 (3.92%)	282924
MRB10130	2	-	259450 (93.04%)	19397 (6.96%)	1688 (0.61%)	84 (0.03%)	18 (0.01%)	17607 (6.31%)	278847
MRB10130	2	+	148534 (95.11%)	7634 (4.89%)	1063 (0.68%)	46 (0.03%)	12 (0.01%)	6513 (4.17%)	156168
		Total	3104855	189546	20810	1037	228	167471	3294401
B) CYb: Unique Sequences
RNAi	Replicate	Induction	Standard Alignments	Non-Standard	1-Mismatch	2-Mismatch	>3-Mismatch	Indels	Total
MRB3010	1	-	29090 (67.26%)	14158 (32.74%)	885 (2.05%)	95 (0.22%)	24 (0.06%)	13154 (30.42%)	43248
MRB3010	2	-	32420 (68.46%)	14934 (31.54%)	954 (2.01%)	97 (0.20%)	25 (0.05%)	13858 (29.26%)	47354
MRB800	1	-	22632 (68.41%)	10451 (31.59%)	762 (2.30%)	68 (0.21%)	16 (0.05%)	9605 (29.03%)	33083
MRB800	2	-	29968 (66.43%)	15146 (33.57%)	1011 (2.24%)	94 (0.21%)	34 (0.08%)	14007 (31.05%)	45114
MRB7260	1	-	30553 (70.79%)	12606 (29.21%)	951 (2.20%)	96 (0.22%)	13 (0.03%)	11546 (26.75%)	43159
MRB7260	1	+	11328 (73.07%)	4175 (26.93%)	427 (2.75%)	24 (0.15%)	13 (0.08%)	3711 (23.94%)	15503
MRB7260	2	-	24975 (72.62%)	9418 (27.38%)	701 (2.04%)	54 (0.16%)	15 (0.04%)	8648 (25.14%)	34393
MRB7260	2	+	11370 (69.47%)	4996 (30.53%)	487 (2.98%)	40 (0.24%)	12 (0.07%)	4457 (27.23%)	16366
MRB10130	1	-	29460 (71.81%)	11566 (28.19%)	907 (2.21%)	60 (0.15%)	18 (0.04%)	10581 (25.79%)	41026
MRB10130	1	+	8627 (56.21%)	6721 (43.79%)	536 (3.49%)	53 (0.35%)	15 (0.10%)	6117 (39.86%)	15348
MRB10130	2	-	23342 (65.24%)	12434 (34.76%)	764 (2.14%)	72 (0.20%)	18 (0.05%)	11580 (32.37%)	35776
MRB10130	2	+	6708 (60.80%)	4324 (39.20%)	394 (3.57%)	36 (0.33%)	10 (0.09%)	3884 (35.21%)	11032
		Total	260473	120929	8779	789	213	111148	381402

## Sheet: Table S4
Table S4. Determination of Exacerbated Pause Sites (EPSs) in RPS12.
The number of sequences at each editing stop site (ESS) in RPS12 for replicates 1 and 2.
The average uninduced sample includes the two uninduced MRB10130 samples from this study
and 8 uninduced samples from a previous study (n=10). The number of sequences at each
editing stop site for each replicate of the induced samples are shown (norm. count) with the
associated p and q values for that replicate. Sites are considered significantly increased if
p < 0.05 and q < 0.05 and the norm. count is greater than the average of the uninduced.
If an editing stop site is significantly increased in both replicates, this is an EPS and is shown in bold.
RPS12	Average of Uninduced	MRB10130 RNAi
		Replicate 1			Replicate 2
ESS	norm. count	norm. count	p value	q value	norm. count	p value	q value
9	1638.2	562.033	0.301116	0.530603	547.769	0.294754	0.546375
10	17.0939	6.8299	0.40849	0.644054	7.8562	0.456933	0.663219
11	7.49774	3.3048	0.546274	0.685327	3.2509	0.541127	0.678143
12	555.113	1844.07	0	0	1812.89	0	0
13	19.7539	6.1689	0.203305	0.46519	8.398	0.287581	0.546375
14	25.8069	17.1849	0.219759	0.494457	15.9834	0.162059	0.452514
15	4164.38	5568.11	0.166912	0.426284	5385.85	0.229082	0.52417
16	900.077	1230.26	0.262765	0.518309	1228.82	0.264848	0.539874
17	12145.1	4859.57	0.0971878	0.328009	4972.72	0.102494	0.350265
18	86.5685	47.3685	0.447997	0.655303	43.0738	0.399851	0.620459
19	1178.04	854.616	0.347153	0.58582	821.111	0.299495	0.546375
20	28.4511	13.2191	0.258592	0.518309	11.1071	0.198315	0.482018
21	2887.63	5470.51	0.00420988	0.0334314	5341.96	0.00653707	0.049028
22	657.957	818.264	0.235671	0.518309	813.526	0.249802	0.539874
23	179.679	141.885	0.570904	0.700655	137.349	0.525593	0.675762
24	48.042	62.5705	0.101882	0.335466	62.8498	0.0954662	0.350265
25	10.7796	19.388	0.0567415	0.2471	20.5887	0.0299276	0.168343
26	83.2576	11.8972	0.702343	0.79407	12.1907	0.703509	0.798099
27	102.866	134.835	0.641249	0.75249	124.074	0.757238	0.798649
28	434.836	1718.71	0	0	1697.49	0	0
29	73.9589	367.051	0	0	343.236	0	0
30	115.319	793.588	0	0	767.472	0	0
31	1355.6	4775.41	0	0	4602.39	0	0
32	104.869	6.3892	0.645215	0.75249	11.1071	0.661123	0.776101
33	1.31326	1.3219	0.995533	0.995533	0.2709	0.499385	0.663219
34	27.5884	15.4223	0.692591	0.792371	15.4415	0.693051	0.792898
35	763.875	677.92	0.581427	0.705558	687.555	0.624484	0.746065
36	10.327	6.1689	0.450769	0.655303	8.1271	0.689907	0.792898
37	116.694	122.497	0.821109	0.859301	124.887	0.749548	0.798649
38	5322.08	3953.62	0.504429	0.666174	4073.59	0.542514	0.678143
39	2619.53	2927.15	0.760394	0.821134	2956.65	0.738225	0.798649
40	226.734	364.187	0.0143891	0.0971266	391.186	0.0034101	0.0287727
41	54.6427	32.1665	0.199565	0.46519	33.3212	0.223646	0.520556
42	435.937	488.006	0.746225	0.821134	483.564	0.767219	0.802903
43	21.2602	10.355	0.28908	0.530603	10.5653	0.29848	0.546375
44	18.9138	10.7956	0.352429	0.586301	10.0235	0.308523	0.553363
45	25.5109	122.277	0	0	111.071	0	0
46	44.426	246.977	0	0	237.854	0	0
47	334.805	606.758	0.483096	0.655303	629.853	0.446722	0.655516
48	85.2951	302.718	1.032e-07	1.2665e-06	324.272	5e-09	6.09e-08
49	46.1091	68.0785	0.272592	0.518309	69.8933	0.234935	0.528605
50	117.182	180	0.00408232	0.0334314	184.486	0.00209249	0.0201775
51	260.568	608.08	3.9264e-06	4.41724e-05	596.531	8.1248e-06	9.14037e-05
52	3.50458	0.8813	0.361472	0.587936	1.0836	0.399682	0.620459
53	68.4483	183.085	1e-10	1.9e-09	199.115	0	0
54	189.921	235.08	0.553338	0.685327	244.085	0.477105	0.663219
55	3299.67	2697.36	0.782387	0.831672	2762.14	0.805293	0.836266
56	48.2584	92.3135	0.253373	0.518309	91.5657	0.26152	0.539874
57	218.183	223.623	0.925126	0.939037	200.198	0.756028	0.798649
58	30.6588	34.1494	0.723834	0.807583	33.863	0.745674	0.798649
59	212.865	354.052	0.131287	0.377102	370.326	0.0923778	0.350265
60	115.991	239.046	0	0	257.63	0	0
61	42.0453	153.121	0	0	162.543	0	0
62	1379.76	889.647	0.0520461	0.242284	940.58	0.0817083	0.344707
63	344.055	103.109	0.00832588	0.0624441	112.967	0.0113865	0.0809043
64	59.0431	18.5068	0.0490483	0.242284	24.3814	0.0923867	0.350265
65	266.286	188.593	0.356123	0.586301	183.131	0.323327	0.559605
66	2457.65	720.001	0.018507	0.118974	736.86	0.0196763	0.126491
67	1041.93	458.704	0.0658907	0.260272	470.019	0.0713122	0.325911
68	1330.53	1316.4	0.993142	0.995533	1391.64	0.970341	0.979731
69	106.436	35.251	0.0445867	0.240768	36.843	0.0495749	0.247874
70	205.204	91.2119	0.00171565	0.0165438	88.3148	0.00130362	0.0135376
71	183.473	69.6207	0.0710658	0.266497	70.1642	0.0724246	0.325911
72	24.0449	19.1677	0.655463	0.756303	21.6723	0.828164	0.853451
73	54.5899	60.147	0.820522	0.859301	63.6625	0.711087	0.798649
74	42.6368	18.9474	0.106974	0.335847	18.4215	0.0994078	0.350265
75	137.209	48.2498	0.0404348	0.227445	46.3246	0.036293	0.195982
76	890.779	173.611	0.509202	0.666174	159.834	0.501099	0.663219
77	425.131	139.902	0.0504665	0.242284	152.79	0.0618164	0.298044
78	126.252	151.139	0.52307	0.666174	157.937	0.41617	0.631269
79	181.667	101.787	0.46503	0.655303	94.2747	0.424117	0.631983
80	15.6362	9.4737	0.458952	0.655303	11.378	0.608844	0.733874
81	542.45	225.827	0.255799	0.518309	231.894	0.265022	0.539874
82	2320.56	3122.58	0.16654	0.426284	3243.81	0.111268	0.356727
83	825.868	458.263	0.0249804	0.153289	458.912	0.0252375	0.154867
84	10.8725	4.4064	0.424796	0.647139	5.4181	0.500787	0.663219
85	60.0836	20.2693	0.111107	0.340895	26.8195	0.183149	0.466512
86	0.18326	0	0.646584	0.75249	0	0.646584	0.765691
87	4.1514	0.661	0.124465	0.368278	0.8127	0.141689	0.425068
88	28.2306	7.9315	0.0540281	0.243126	9.7526	0.0794702	0.344707
89	2.50068	0	0.1506	0.414919	0.2709	0.199948	0.482018
90	0.36069	0	0.485753	0.655303	0	0.485753	0.663219
91	1.66417	1.1016	0.766391	0.821134	1.3545	0.870094	0.889868
92	13.4676	8.3721	0.621038	0.741948	13.8161	0.973028	0.979731
93	33.9029	14.3207	0.106696	0.335847	15.7125	0.133987	0.411097
94	47.0972	4.847	0.471041	0.655303	7.0435	0.494408	0.663219
95	211.297	148.715	0.412544	0.644054	170.67	0.594755	0.729734
96	66.3599	19.8287	0.00312903	0.0281613	22.2142	0.00505844	0.04017
97	105.874	61.4689	0.201634	0.46519	70.9769	0.315622	0.553363
98	3.44848	2.8641	0.895538	0.922883	4.8763	0.748358	0.798649
99	277.384	33.7088	0.00162437	0.0165438	41.4484	0.00227779	0.0205001
100	18.6655	3.5251	0.0597731	0.252168	1.0836	0.0288138	0.168343
101	4.61492	1.3219	0.464921	0.655303	0.5418	0.366057	0.597179
102	8.13326	1.3219	0.0756327	0.275957	1.8963	0.103782	0.350265
103	607.74	202.693	0.0100483	0.071396	223.767	0.0146778	0.0990751
104	4.00336	0.8813	0.426632	0.647139	0.2709	0.341912	0.58428
105	0.09002	0	0.550014	0.685327	0	0.550014	0.68121
106	19.6813	18.9474	0.915721	0.936533	19.5051	0.979731	0.979731
107	1844.17	1109.08	0.27122	0.518309	1263.77	0.384995	0.611462
108	0.77967	0.4406	0.757078	0.821134	1.3545	0.600004	0.729734
109	214.604	88.3478	0.0470903	0.242284	104.84	0.0843234	0.344959
110	0.84169	0.2203	0.70584	0.79407	0.2709	0.728807	0.798649
111	120.077	29.743	0.521196	0.666174	27.3613	0.51027	0.668801
112	34.4146	11.8972	0.17999	0.433906	15.4415	0.258585	0.539874
113	14.6349	3.9657	0.489674	0.655303	1.8963	0.409473	0.628169
114	5.6293	1.5422	0.319221	0.545504	1.0836	0.267938	0.539874
115	45.0141	7.4908	0.294524	0.530603	12.7325	0.367154	0.597179
116	11.2395	2.2032	0.490263	0.655303	0.8127	0.426004	0.631983
117	26.2574	2.4235	0.0854284	0.303496	4.3345	0.113624	0.356727
118	42.6704	7.0502	0.125487	0.368278	9.7526	0.156804	0.450394
119	484.29	127.785	0.0881483	0.305129	143.308	0.102891	0.350265
120	40.3088	10.5753	0.170514	0.426284	9.4817	0.155327	0.450394
121	0.98718	0.4406	0.585352	0.705558	1.6254	0.524088	0.675762
122	2.67823	0.8813	0.316329	0.545504	1.0836	0.373885	0.600886
123	207.669	36.3526	0.279809	0.524641	41.7193	0.295149	0.546375
124	38.8088	11.0159	0.179494	0.433906	16.7961	0.287715	0.546375
125	15.3144	5.0673	0.269412	0.518309	3.7927	0.214313	0.507583
126	9.09372	1.7625	0.30264	0.530603	1.8963	0.31155	0.553363
127	52.2198	5.0673	0.0671721	0.260272	11.378	0.112846	0.356727
128	21.7763	4.1861	0.067478	0.260272	2.709	0.0474771	0.246516
129	2258.49	272.094	0.47512	0.655303	292.848	0.479746	0.663219
130	7.68325	1.1016	0.246733	0.518309	1.3545	0.265359	0.539874
131	8.94369	3.0845	0.0372574	0.218685	5.1472	0.17713	0.459856
132	10.2776	3.5251	0.241029	0.518309	2.4381	0.173465	0.459173
133	10.7217	5.0673	0.298526	0.530603	8.398	0.669213	0.778826
134	0.57832	0.4406	0.855321	0.888218	0.8127	0.756328	0.798649
135	59.4327	21.3709	0.167497	0.426284	23.5687	0.193399	0.482018
136	1681.66	77.9928	0.270714	0.518309	89.1275	0.274055	0.54408
137	2553.61	855.497	0.147021	0.413498	958.46	0.173133	0.459173
138	869.71	121.396	0.155708	0.420412	136.536	0.164246	0.452514
139	9.25829	3.3048	0.41175	0.644054	2.709	0.366546	0.597179
140	41.7376	20.2693	0.465185	0.655303	21.6723	0.494855	0.663219
141	2.20716	0.2203	0.415057	0.644054	0	0.365256	0.597179
142	3.97274	1.3219	0.515552	0.666174	1.0836	0.47853	0.663219
143	0	0	NaN	NaN	0	NaN	NaN
144	0	0	NaN	NaN	0	NaN	NaN
145	0	0	NaN	NaN	0	NaN	NaN
146	0	0	NaN	NaN	0	NaN	NaN
147	3.65949	2.6438	0.757482	0.821134	1.6254	0.53631	0.678143

## Sheet: Table S5
Table S5. Determination of Exacerbated Pause Sites (EPSs) in CYb.
The number of sequences at each editing stop site (ESS) in CYb for replicates 1 and 2.
The average uninduced sample includes the eight uninduced samples.
The number of sequences at each
editing stop site for each replicate of the induced samples are shown (norm. count) with the
associated p and q values for that replicate. Sites are considered significantly increased if
p < 0.05 and q < 0.05 and the norm. count is greater than the average of the uninduced.
If an editing stop site is significantly increased in both replicates, this is an EPS and is shown in bold.
CYb	Average of Uninduced	MRB10130 RNAi						MRB7260 RNAi
		Replicate 1			Replicate 2			Replicate 1			Replicate 2
ESS	norm. count	norm. count	p value	q value	norm. count	p value	q value	norm. count	p value	q value	norm. count	p value	q value
557	1237.06	270.764	0.00387769	0.0103405	336.613	0.00712079	0.0244141	1160.95	0.820068	0.855723	982.622	0.447004	0.558104
558	12546.8	4328.91	0.0119275	0.02202	5178.56	0.0241755	0.0527465	15094.1	0.435762	0.562236	12035.1	0.875609	0.91564
559	5299.41	1831.28	0.00559278	0.0122024	2680.17	0.0363892	0.0727784	8404.01	0.0131267	0.0420381	7022.48	0.168641	0.269825
560	789.642	809.703	0.850037	0.850037	723.062	0.530338	0.582727	873.642	0.428558	0.562236	945.747	0.141231	0.24211
561	96.4513	22.9649	0.321521	0.428694	23.5627	0.325473	0.459491	126.117	0.689011	0.751649	124.568	0.704468	0.805107
562	20.7277	10.7417	0.270713	0.382183	12.791	0.381361	0.508482	31.7383	0.224583	0.384999	29.9239	0.310435	0.456734
563	11.2526	7.0376	0.375958	0.474894	4.7125	0.169515	0.254273	18.3745	0.13466	0.26932	23.6608	0.00915055	0.0275511
564	35.5727	6.6672	0.0387906	0.0620649	9.425	0.0615879	0.113701	71.8286	0.00954541	0.0381817	84.9012	0.000421228	0.00168491
565	489.723	3350.31	0	0	2326.74	0	0	2200.82	0	0	2701.55	0	0
566	141.905	297.805	3.58e-08	2.149e-07	245.061	0.000266266	0.00127808	240.545	0.000489481	0.00234951	299.244	2.68e-08	1.585e-07
567	2930.13	3073.98	0.61568	0.671651	3152.78	0.437177	0.524612	3100.35	0.552519	0.663023	3213.04	0.32352	0.456734
568	1580.81	1149.73	0.475789	0.543759	1079.87	0.407298	0.514482	1119.2	0.445103	0.562236	1139.21	0.465087	0.558104
569	8624.59	10311.3	0.734609	0.766549	9521.66	0.856921	0.856921	6334.34	0.6453	0.737486	7857.59	0.877488	0.91564
570	51.8838	115.936	5.67226e-05	0.000272269	90.2135	0.015986	0.0383663	65.1467	0.40448	0.562236	66.8074	0.348228	0.464304
571	256.649	568.2	0.00867988	0.0173598	447.032	0.108774	0.174039	252.237	0.970355	0.970355	254.008	0.982252	0.982252
572	159.307	1020.09	0	0	840.209	0	0	679.038	0	0	691.046	0	0
573	196.392	620.427	0	0	519.745	0	0	411.766	0	0	422.422	0	0
574	449.474	73.3399	0.00306784	0.00920351	142.727	0.0157502	0.0383663	268.108	0.153383	0.283168	196.945	0.0468266	0.112384
575	705.323	1053.43	0.000151695	0.00060678	1182.22	2.105e-07	1.263e-06	1500.9	0	0	1212.98	3.3e-08	1.585e-07
576	76.0939	55.9308	0.432072	0.518487	65.3043	0.674182	0.703495	48.4428	0.281294	0.45007	37.5793	0.13343	0.24211
577	3881.14	2185.02	0.133877	0.200816	3177.72	0.534167	0.582727	1998.7	0.0961823	0.209852	1914.47	0.0821955	0.164391
578	2618.07	429.669	0.0255432	0.0437884	924.366	0.0839367	0.143891	858.613	0.0725926	0.174222	837.189	0.0691797	0.150937
579	484.184	51.8565	0.00522459	0.0122024	110.412	0.0157535	0.0383663	198.784	0.0652276	0.17394	169.804	0.0422648	0.112384
580	253.623	25.5579	0.00053164	0.00182277	71.364	0.00563156	0.0225263	91.8749	0.0140127	0.0420381	82.1183	0.00918369	0.0275511
